# Supplementary material for: LGALS3 Promotes Treatment Resistance in Glioblastoma and Is Associated with Tumor Risk and Prognosis
Source: Oxford University Press journal article supplement (doi:10.1158/1055-9965.epi-18-0638), 2018-10-19
Supplement: 10559965epi180638-sup-203083_3_supp_5024860_p3x3gl.docx [file 10559965epi180638-sup-203083_3_supp_5024860_p3x3gl.docx]

**Supplementary Table 3.** Clinicopathological characteristics of glioblastoma patients (n=120)

| Characteristics | Value | LGALS3 Expression | | χ2 |
| --- | --- | --- | --- | --- |
| Low | High |
| Age (years) | | | |  |
| <60 | 90 (75%) | 45 | 45 | 0.291 |
| ≥60 | 30 (25%) | 11 | 19 |
| Gender | | | |  |
| Male | 79 (65.8%) | 36 | 43 | 0.847 |
| Female | 41 (34.2%) | 20 | 21 |
| KPS |  |  |  |  |
| <70 | 55 (45.8%) | 17 | 38 | 0.002 |
| ≥70 | 65 (54.2%) | 39 | 26 |
| Seizure | | | |  |
| Yes | 15 (12.5%) | 8 | 7 | 0.594 |
| No | 105 (87.5%) | 48 | 57 |
| IICP |  |  |  |  |
| Yes | 53 (44.2%) | 21 | 32 | 0.199 |
| No | 67 (55.8%) | 35 | 32 |
| Cystic degeneration |  |  |  |  |
| Yes | 26 (21.7%) | 14 | 12 | 0.506 |
| No | 94 (78.3%) | 42 | 52 |
| Necrosis on MRI | | | |  |
| Yes | 21 (17.5%) | 9 | 13 | 0.639 |
| No | 98 (82.5%) | 47 | 51 |
| Boundary |  |  |  |  |
| Unclear | 73 (60.8%) | 33 | 40 | 0.711 |
| Clear | 47 (39.2%) | 23 | 24 |
| MTD(cm) |  |  |  |  |
| <4 | 47 (39.2%) | 22 | 25 | 1.000 |
| ≥4 | 73 (60.8%) | 34 | 39 |
| Tumorigenesis |  |  |  |  |
| Primary | 104 (86.7%) | 50 | 54 | 0.592 |
| Secondary | 16 (13.3%) | 6 | 10 |
| IDH1 |  |  |  |  |
| Mutant | 8 (6.7%) | 7 | 1 | 0.025 |
| Wildtype | 112 (93.3%) | 49 | 63 |
| Resection degree | | | |  |
| Gross total resection | 94 (78.3%) | 44 | 50 |  |
| Partial resection | 26 (21.7%) | 12 | 14 |  |
| Chemotherapy | | | |  |
| Yes | 90 (75%) | 43 | 47 |  |
| No | 30 (25%) | 13 | 17 |  |
| Radiotherapy | | | |  |
| Yes | 88 (73.3%) | 45 | 43 |  |
| No | 32 (26.7%) | 11 | 21 |  |
| Survival status | | | |  |
| Live | 8 (6.7%) | 4 | 4 |  |
| Dead | 108 (90.0%) | 49 | 59 |
| Recurrence | | | |  |
| No | 6 (5%) | 3 | 3 |  |
| Yes | 110 (91.7%) | 50 | 60 |

Abbreviations: IICP, increased intracranial pressure; MTD, mean tumor diameter
