# Supplementary material for: LGALS3 Promotes Treatment Resistance in Glioblastoma and Is Associated with Tumor Risk and Prognosis
Source: Oxford University Press journal article supplement (doi:10.1158/1055-9965.epi-18-0638), 2018-10-19
Supplement: 10559965epi180638-sup-203083_3_supp_5024864_p1x1gl.docx [file 10559965epi180638-sup-203083_3_supp_5024864_p1x1gl.docx]

**Supplementary Table 5.** Characteristics of all participants in the study of LGALS3 SNPs and glioma risk.

| Variants | Case (n=961) | Control (n=1351) |
| --- | --- | --- |
| Age (46.4±12.8) | 43.3±14.1 | 48.6±11.2 |
| Sex |  |  |
| Male | 574 (59.6%) | 916 (67.8%) |
| Female | 389 (40.4%) | 435 (32.2%) |
| Pathological Grade |  |  |
| WHO I | 24 (2.5%) |  |
| WHO II | 418 (43.4%) |  |
| WHO III | 197 (20.5%) |  |
| WHO IV | 324 (33.6%) |  |
