# Supplementary material for: LGALS3 Promotes Treatment Resistance in Glioblastoma and Is Associated with Tumor Risk and Prognosis
Source: Oxford University Press journal article supplement (doi:10.1158/1055-9965.epi-18-0638), 2018-10-19
Supplement: 10559965epi180638-sup-203083_3_supp_5024865_pwxwgl.xlsx [file 10559965epi180638-sup-203083_3_supp_5024865_pwxwgl.xlsx]

## Sheet: DEGs in each group
T98G-1a	T98G-1n	T98G-2d	T98G-2h	T98G-3c	T98G-4b	T98G-4d	T98G-4p
ABHD10	ABHD3	ACN9	ABHD10	ABCB9	AAAS	AARSD1	ABCE1
ABHD14A	AIDA	ACTA2	ABHD11	ABHD3	AAGAB	AATF	ABHD3
ACTA2	AKR1B10	ACTR2	ABHD5	ABHD5	AAMP	ACO2	ABHD7
ACTL6A	AKR1B15	ADA	ABHD7	ABHD7	AASDHPPT	ACTR1B	ACADM
ACTN1	ALDH1A3	ADM	ACSF2	ABHD8	ABCB10	ACVR1	ACO1
ACTR1B	ALDH3A1	ADRB2	ACTA2	ACP6	ABCB9	ADCK2	ACO2
ACTR3	ALG5	AHNAK	ACTR1B	ACTA2	ABCC4	ADCK4	ACTR2
ACVR1	AP1S2	AIDA	ACTR2	ACTN4	ABCF1	ADRB2	ADORA2B
ACVRL1	ARHGDIB	AK3	ACTR6	ADCK2	ABHD3	AHCYL1	ADRA1B
ACY1	ARL5A	AKR1B10	ACVR1	ADORA2B	ABHD8	AKR1B10	ADRB2
ADA	ASNS	AKR1B15	ACVRL1	AKR1B10	ACAA2	AKR1B15	AK1
AFAP1L2	ASNSD1	ALDH2	ADCK2	AKR1B15	ACADM	AKR1C3	AKR1B10
AGK	B4GALT3	ALDH7A1	ADM	ALG14	ACADVL	ALDH3A1	AKR1B15
AKR1B15	BANP	AMD1	ADRB2	ANKRD1	ACAT1	ALG8	ALG6
ALDH1A3	BUB1	ANGPT1	AGTRAP	ANKRD13A	ACAT2	APOBEC3B	ANKIB1
ALDH3A1	C19orf10	ANKIB1	AHCYL1	ANXA11	ACBD3	ARCN1	ANLN
ALDH3A2	C19orf2	ANLN	AHSA1	ANXA8	ACBD6	ARHGEF10	ANXA1
ALDH7A1	C1R	ANXA1	AKR1B1	ARHGEF18	ACLY	ARMC1	AP1S2
ALG8	CADM1	AP1S2	AKR1B10	ASAP3	ACO1	ATIC	APOBEC3B
AMD1	CAPZA2	AP3B1	AKR1B15	ASNS	ACO2	ATP6V1A	APOBEC3G
ANKIB1	CCDC99	APCDD1L	AKT1	ATF5	ACOT8	ATP6V1D	ARHGAP21
ANKRD13A	CDC2	APH1B	ALDH1A3	ATG16L1	ACOT9	AURKA	ARPC1A
ANKRD9	CDH2	ARHGAP22	ALDH3A1	ATG9A	ACP1	AUTS2	ARPC1B
AP3B1	CDH6	ARV1	ALDH3A2	ATOH8	ACSL3	B4GALNT1	ARPC4
APH1B	CEBPZ	ASNSD1	ALDH7A1	ATP1B1	ACTL6A	B4GALT5	ASNSD1
ARHGDIB	COL1A2	ATP6AP2	ALG8	ATP6V1D	ACTN1	B9D1	ATOH8
ARL5A	COPB1	ATP6V1D	ALPK2	ATPBD1B	ACTR10	BACE2	ATP1B1
ASXL1	CPNE3	BACE2	ALS2	AXL	ACTR1B	BAD	ATP6AP2
ATF5	CRISPLD2	BAMBI	ANAPC5	BACE2	ACTR2	BARD1	ATP6V0B
ATF6	CSDA	BBX	ANKIB1	BAG3	ACTR3	BCAR3	ATP6V1A
ATP1B1	CTNNAL1	BCAR3	AP1S1	BAMBI	ACVR1	BEST4	ATP6V1D
ATP6V1A	CTSB	BCAS4	AP3B1	BAX	ACY1	BEX1	ATPAF1
ATP6V1B2	CTSD	BCAT1	APEH	BCAR3	ADA	BLOC1S1	AUTS2
AURKA	CYR61	BHLHB2	ARCN1	BCL3	ADARB1	BOP1	AYP1p1
AYP1p1	DDIT4	BMP7	ARD1A	BCYRN1	ADCK2	BRIX1	B4GALNT1
B4GALT5	DDX18	BUB1	ARF4	BHLHB2	ADCK4	BSCL2	BACE2
BACE2	DEK	C10orf35	ARF5	BLCAP	ADD1	BZW2	BAK1
BARD1	DHRS2	C11orf2	ARHGDIB	BOP1	ADIPOR1	C10orf35	BCAR3
BEX1	DLGAP5	C14orf100	ARID5B	BRI3	ADIPOR2	C11orf67	BEST4
BHLHB2	DOCK10	C14orf166	ARMC1	BRI3P1	ADM	C12orf59	BIRC2
BMP7	DR1	C14orf32	ARMC10	BRIX1	ADNP2	C14orf32	BNIP3
BRIX1	EIF2AK2	C15orf23	ASB9	BST2	ADO	C14orf4	BUB1
BTF3L4	EIF3A	C15orf52	ASCC1	BTG1	ADPGK	C16orf63	C11orf67
BZW2	EIF3E	C1orf24	ASXL1	C10orf35	ADPRHL2	C19orf60	C14orf100
C11orf67	EXOSC8	C20orf27	ATF2	C11orf74	ADSL	C1orf112	C14orf166
C12orf57	F2RL1	C2orf7	ATF6	C12orf59	ADSS	C1orf19	C14orf4
C14orf159	F3	C4orf27	ATP1B1	C14orf149	AFG3L2	C1orf53	C16orf87
C14orf4	FLJ43681	CAB39	ATP5C1	C14orf4	AGK	C1orf85	C18orf56
C16orf63	FOXN2	CABLES1	ATP5G3	C15orf52	AGPAT2	C1R	C19orf2
C17orf90	FTH1	CADM1	ATP5S	C16orf48	AGPAT9	C1S	C1orf24
C18orf55	GABRA2	CALM1	ATP6V0E2	C18orf8	AGPS	C2orf69	C20orf127
C19orf2	GBA	CAV1	ATP6V1A	C19orf10	AGTRAP	C3orf59	C20orf45
C19orf60	GGCT	CCDC85B	ATP6V1D	C19orf50	AHCY	CADM1	C3orf26
C1orf112	GJA1	CCDC99	AURKA	C19orf66	AHCYL1	CATSPER1	C4orf27
C1orf122	GMFB	CCNA2	AVEN	C20orf127	AHNAK	CBS	C7orf59
C1orf53	GTF2F1	CD163L1	B3GNT6	C2orf24	AHSA1	CCDC53	C9orf140
C1orf54	HIST1H2BH	CDC40	BARD1	C2orf29	AIDA	CCL2	C9orf21
C1orf71	HMMR	CDC42EP5	BAT2D1	C6orf136	AIFM1	CCND1	CAB39
C20orf11	HNRNPA2B1	CDH2	BAT5	C9orf169	AIG1	CCT8	CADM1
C20orf111	Hs.570988	CDK2AP1	BCAR3	C9orf46	AIP	CD163L1	CALM2
C20orf20	HTRA1	CDK6	BCL3	CADM1	AK1	CD68	CAMK2N1
C20orf27	IER3IP1	CDKN3	BEX1	CAMK2N1	AK2	CD70	CATSPER1
C20orf43	IFITM1	CENTA1	BFAR	CAV1	AK3	CDC23	CBX6
C20orf45	IL6	CEP55	BLOC1S1	CBS	AKIRIN1	CDC45L	CCDC109B
C20orf72	IMPA2	CHEK1	BRI3	CCDC109B	AKIRIN2	CDCA7	CCDC23
C2orf29	ISOC1	CHMP1B	BRI3P1	CCDC53	AKR1B10	CDH6	CCDC24
C2orf7	JAM3	CKAP2L	BRIX1	CCDC97	AKR1B15	CEBPZ	CCDC53
C3orf59	KRTCAP2	CLDND2	BTBD2	CCT3	AKR1C3	CENPM	CCDC58
C9orf103	LAPTM5	CLINT1	BTBD6	CD24	AKR7A2	CENTA1	CCDC92
C9orf119	LGALS3	CLIP3	BTG1	CD44	AKTIP	CERCAM	CCDC99
C9orf3	LOC100128410	CNIH	BUD31	CD68	ALDH16A1	CHAF1B	CCL2
CAB39	LOC100132658	COL18A1	BZW2	CDC26	ALDH18A1	CHCHD7	CCNA2
CADM1	LOC100134504	COL1A2	C11orf68	CDCA7	ALDH1A3	CHIC2	CCNB1
CAMK2N1	LOC113386	COL7A1	C12orf44	CDH15	ALDH3A1	CIRH1A	CD68
CAPN5	LOC151162	COPB1	C12orf59	CDH6	ALDH7A1	COL18A1	CD70
CATSPER1	LOC151579	CPA4	C13orf37	CENPM	ALDH9A1	COL1A2	CDC2
CBS	LOC341315	CPNE3	C14orf112	CENTA1	ALG14	COL4A1	CDC26
CCDC53	LOC388532	CREB3L2	C14orf132	CHFR	ALG8	COPZ2	CDC42EP5
CCDC6	LOC550643	CRISPLD2	C14orf142	CHIC2	ALKBH3	CPA4	CDH6
CCDC85B	LOC641768	CROT	C14orf149	CHMP4B	ALKBH7	CRISPLD2	CDKN3
CCNC	LOC644237	CSE1L	C14orf159	CHPF	ALPK2	CSE1L	CENPM
CCT2	LOC644745	CST3	C14orf166	CHST15	ALS2	CTSC	CENTG2
CCT6A	LOC645157	CTGF	C14orf2	CIRBP	ALS2CR4	CTSF	CEP55
CCT8	LOC646849	CTNNAL1	C14orf4	CIRH1A	AMD1	CTSZ	CHAF1B
CD24	LOC653658	CTSC	C15orf39	CLCF1	AMDHD2	CXCL12	CHCHD4
CD46	LOC727984	CTSH	C16orf63	CLDND1	AMFR	CYBASC3	CIRBP
CD97	LOC728590	CUL2	C18orf55	COL16A1	AMMECR1L	CYGB	CKAP2L
CDC16	LOC729301	CX3CL1	C19orf50	COL1A2	ANAPC13	D2HGDH	CKAP5
CDC23	LOC729340	CXCL12	C1orf112	COL4A1	ANAPC5	DCBLD2	CKS2
CDC26	LOC729608	CYGB	C1orf19	COL5A1	ANGPTL2	DDIT3	CLDND1
CDK6	LOC730255	CYP4F11	C1orf57	COL7A1	ANKIB1	DDX5	CMPK1
CDKN3	LOC92249	CYR61	C1orf71	COPZ2	ANKLE2	DENND2A	CNIH
CDR2	LPP	DBNDD2	C20orf199	CORO1C	ANKMY2	DHCR24	COL16A1
CEBPZ	LTBR	DCBLD2	C20orf72	CPA4	ANKRD13A	DHX15	COL18A1
CFD	MARCH7	DDX1	C22orf13	CRELD2	ANKRD13C	DPYSL3	COL4A1
CHAF1B	MCTS1	DLD	C2CD2	CRIP2	ANKRD33	DYNC1I2	COL6A1
CIRH1A	MFGE8	DLGAP5	C2orf28	CROT	ANKRD37	DYNC1LI2	COMMD10
CITED2	MGST1	DPYSL4	C2orf44	CRTC3	ANKS1A	DYRK4	COPB1
CLDND2	MGST2	DR1	C2orf7	CSRP2	ANO6	ECM1	COPB2
CLINT1	MITD1	DRAP1	C3orf21	CTDSP2	ANP32B	EDN1	COPS4
COG2	MMADHC	DYNC1H1	C5orf15	CTDSPL	ANTXR1	EFHD1	CPA4
COL1A2	MRPL13	EEF1A2	C6orf130	CTSA	ANXA1	EFR3A	CPNE3
COPB1	MRPL15	EFHD1	C6orf136	CX3CL1	ANXA2	EIF2A	CPSF3
COPB2	MRPL19	EFR3A	C6orf160	CYCSL1	ANXA2P1	EIF2C2	CREG1
COPS3	MRPS31	EIF2A	C6orf173	CYGB	ANXA5	EIF3D	CRIPT
COPZ2	MTCP1	EIF2AK2	C6orf57	CYP2S1	AOF2	EIF3L	CRISPLD2
COX10	MYC	EIF2B2	C7orf23	CYP4F11	AP1S1	EIF4G2	CROT
CPNE3	NARS	ELL2	C7orf42	CYR61	AP1S2	ENO2	CSE1L
CREG1	NDRG1	EMP1	C7orf43	DAGLB	AP3B1	EPHA4	CTGF
CRISPLD2	NKD2	EPAS1	C7orf47	DEDD2	AP3S2	EPRS	CTNNAL1
CRK	NSA2	EPRS	C7orf49	DENND2A	AP4B1	ERAP2	CUL2
CRLS1	NSMCE2	FAM129A	C7orf68	DIRC2	APBA2BP	ERRFI1	CWC15
CSE1L	OKL38	FAM176A	C8orf59	DKFZp761P0423	APBA3	ETS2	CXCL12
CSNK2A1	PAFAH1B3	FAM46A	C9orf119	DNAJB6	APEH	EXOSC10	CXorf26
CSNK2A1P	PAPOLA	FAM98A	CADM1	DPM3	APEX1	FAF2	CXXC5
CTSF	PBK	FBXO33	CAP2	DPYSL3	APH1B	FAM127A	CYBRD1
CTSH	PERP	FBXO34	CAPZA2	DRAP1	APIP	FAM127C	CYGB
CTXN1	PGD	FERMT2	CARD10	DUSP1	APITD1	FAM20B	CYP26B1
CUL4A	PIPSL	FKBP3	CAT	DYNC1LI2	APOA1BP	FAM43A	CYP4F11
CX3CL1	PJA2	FLNC	CATSPER1	E2F2	APOBEC3B	FASN	CYR61
CXCL12	PLAC8	FOSL1	CCDC115	EEF1A2	APOBEC3G	FLJ20021	D2HGDH
CXorf12	PLS3	FOXJ3	CCDC24	EEF2K	APOO	FLNB	DAP
CYB5D1	PMAIP1	GABARAPL1	CCDC53	EFHD1	APP	FLOT1	DDIT3
CYBASC3	PNPLA7	GBE1	CCDC59	EGR1	APPL2	FRAP1	DDT
CYP2S1	PPAP2A	GCHFR	CCDC6	EIF3E	APRT	FUCA1	DDX1
CYR61	PPP1R2	GFPT1	CCDC90A	EIF3G	ARAF	GAPDHL6	DDX10
CYTSA	PRICKLE1	GLIPR1	CCDC92	EIF3H	ARCN1	GARS	DDX50
DAP3	PRIM1	GLT8D2	CCND1	EMP1	ARF4	GART	DEK
DARS	PRSS23	GMFB	CCNK	ENG	ARF5	GFM1	DGCR6
DCBLD2	PSMB2	GNG12	CD163L1	ENO2	ARGLU1	GLIPR1	DHX15
DCI	PTGES3	GNL2	CD24	EPHA2	ARHGAP1	GMPS	DLGAP5
DDX1	PTGR1	GPAA1	CD9	EPHA4	ARHGAP17	GNE	DNAJA2
DDX18	RAD21	GPKOW	CDC16	EPHB2	ARHGEF10	GNG11	DPYSL3
DDX21	RGS2	GPR177	CDC23	ERRFI1	ARHGEF19	GNL2	DR1
DDX27	RHOBTB3	GPT2	CDC26	ESYT1	ARID5B	GNPAT	DUT
DDX47	RPF2	GPX3	CDC34	ETV5	ARIH1	GPRC5A	DYNLL2
DDX5	RPL7	GTF2B	CDK4	F3	ARIH2	GSDMD	DYRK4
DENR	S100A16	HEXB	CDK5	FAH	ARL2	GYPC	ECOP
DHX15	S100A4	HIST1H2BH	CDKN3	FAM107B	ARL2BP	H3F3B	ECT2
DHX32	SCG2	HIST1H4K	CEBPZ	FAM46A	ARL5A	HDDC3	EFHD2
DHX33	SDCCAG10	HIST2H2AC	CENTG3	FAM62B	ARL6IP5	HEATR1	EIF1B
DHX35	SLC25A46	HLA-B	CERCAM	FAM65A	ARL8B	HIST1H2BH	EIF2A
DIMT1L	SLC27A3	HMMR	CGRRF1	FAM89A	ARMC1	HIST1H4K	EIF2AK2
DNAJB11	SLC38A2	HOXC13	CHCHD1	FAM96B	ARMC6	HJURP	EIF3D
DPM1	SNORD13	Hs.100261	CHCHD10	FBLN1	ARMCX6	HLA-A29.1	EIF4A2
DPM3	SOCS2	Hs.213061	CHCHD5	FLII	ARPC1A	HLA-B	ENO2
DPY19L1	SRM	Hs.390407	CHD8	FLJ22795	ARPC3	HLA-E	EPRS
DRAP1	STAT1	Hs.397465	CHMP5	FLNC	ARPC5	HLA-F	ETS2
DSTN	SUZ12	Hs.413494	CHMP6	FLOT1	ARPC5L	HLA-G	ETV5
DYNC1I2	TARS	Hs.551128	CHPT1	FNBP1	ARPP19	HLA-H	EXOSC9
DYNC1LI2	TFAP2C	HSD17B2	CHST15	FOSL1	ARS2	HMGCR	FAM129A
DYRK4	TIMP4	HSP90AA1	CHSY1	FTSJD2	ASAP1	HMGCS1	FAM188A
EEF1A2	TMED7	HSP90B1	CIAPIN1	FVT1	ASB1	HNRNPA2B1	FAM46A
EEF1AL7	TMEM90B	HSPB8	CITED2	FZD2	ASB3	HNRNPC	FAM84B
EFEMP2	TNFRSF1A	HSPE1	CKS2	GABARAPL1	ASB9	HOXA5	FAM98A
EFHD1	TOP2A	HTRA1	CLASP1	GANAB	ASCC1	HRASLS3	FASN
EGR1	TOR3A	HTRA2	CLDND1	GCLM	ASCC2	Hs.176498	FBLN1
EIF2A	TTK	IDH3B	CLIP3	GDF15	ASF1B	Hs.213061	FKBP3
EIF2B2	TUBB2B	IFI44	CNIH	GFOD2	ASGR1	Hs.34447	FLJ43681
EIF2S3	TXNDC9	IGFBP2	CNPY4	GGCX	ASH2L	Hs.57079	FNBP4
EIF3L	TXNIP	IGFBP3	COG2	GLIPR1	ASPM	HSD17B2	FOXD1
EIF4G2	UBXN4	IGFBP7	COL5A2	GLIPR2	ASPSCR1	HSP90AA1	FOXJ3
ELF1	UCHL1	IL13RA1	COPA	GLT8D2	ASS1	HSPA9	FOXN2
ELL2	VPS4B	IRF9	COPB1	GNE	ASXL1	HSPB8	FRG1
ELOVL5	WASL	IRS1	COPB2	GNG5	ASXL2	HSPD1	FSCN1
EMP1	WBP5	ISOC1	COPS6	GOLGA3	ATF4	HSPH1	GCAT
ENG	WDR41	ITGA3	COQ10B	GPKOW	ATG16L1	HYI	GDF15
ENOPH1	XPO1	ITGA5	COQ2	GPR177	ATG7	IARS2	GMNN
EPDR1		JAM3	COQ9	GPR37	ATIC	IFI27L2	GPX7
EPHA4		KCTD14	COX10	GPRC5A	ATL3	IFITM1	GTF2B
EPRS		KIAA0196	COX7A2L	GPRC5C	ATOH8	IGFBP3	GTF2IRD2B
ERI1		KIF23	COX7B	GSDMD	ATP1A1	IGFBP4	GYPC
ETS2		KLF9	CPA4	GUSB	ATP1B1	IGFBP7	H3F3B
EVI5L		KLHDC2	CPOX	H3F3B	ATP2A2	IL2RB	HERC5
EXO1		LAMA4	CPSF3	HEBP2	ATP5A1	IL7R	HEXB
FAM129A		LARS	CREG1	HECTD3	ATP5C1	IL8	HJURP
FAM158A		LDB2	CRIP2	HEXDC	ATP5D	IMMT	HMGB2
FAM168B		LMBRD1	CRISPLD2	HEXIM2	ATP5F1	INTS1	HMGCS1
FAM176A		LMO4	CRK	HEY1	ATP5H	IRF9	Hs.127310
FAM20B		LOC100128410	CSE1L	HLA-DMB	ATP5J	ISOC1	Hs.176498
FAM43A		LOC100128892	CSNK1G2	HLA-E	ATP5O	ITGA5	Hs.413494
FAM62B		LOC100134073	CSNK2A1	HMGCR	ATP6AP2	ITPRIPL2	Hs.568928
FAM89B		LOC100134393	CSNK2A1P	HMGCS1	ATP6V0B	JAM3	Hs.570988
FASTKD5		LOC645094	CSNK2A2	HNRNPA3	ATP6V0E2	JUN	HSD17B2
FBXO28		LOC645381	CSRP2	HOTAIR	ATP6V1A	KBTBD2	HSP90AA1
FBXO5		LOC646723	CTDSP1	HOXC13	ATP6V1B2	KIAA0913	HSPA14
FIBP		LOC646849	CTSZ	HRASLS3	ATP6V1D	KIAA1324	HSPA1A
FKBP10		LOX	CX3CL1	Hs.163752	ATP6V1E1	KIF20A	HSPH1
FLJ20021		LPXN	CXorf38	Hs.374257	ATP6V1F	KIF4A	HYI
FOSL1		LYPD1	CXorf40A	Hs.545589	ATP6V1G1	KLHDC2	IFITM1
GALNT9		LYPD6B	CXorf56	Hs.568928	ATPAF1	KPNA2	IFRD1
GART		LYRM5	CYB561D2	Hs.572219	ATPBD3	KPNA4	IGFBP3
GBP2		MAPK6	CYLN2	Hs.579631	ATRIP	KPNB1	IGFBP5
GDI2		MARCKS	CYP2S1	HSD17B2	ATXN2	LAPTM5	IGFBP7
GLDN		MCOLN2	CYR61	HSPA1A	AURKA	LARS	IL2RB
GLIPR1		MFGE8	DBI	HSPA9	AURKAIP1	LDOC1	INTS1
GLO1		MGC87042	DCBLD2	HYAL3	AUTS2	LGALS3	ISOC1
GMFG		MGMT	DCUN1D5	HYI	AVPI1	LIMCH1	ITGB3BP
GMPS		MIR1978	DDX18	ID2	AXL	LMNB1	JUN
GNE		MMP13	DDX21	ID3	AXUD1	LMO4	KIAA1618
GNL2		MNAT1	DDX27	IDH2	AYP1p1	LOC100128731	KIF2C
GNPAT		MPP1	DDX54	IFI30	AZIN1	LOC100129599	KIFAP3
GPAA1		MSX1	DEDD2	IFITM1	B2M	LOC100129681	KLF9
GPKOW		MT1F	DHRS3	IGFBP2	B3GAT3	LOC100130154	KPNA1
GPT2		MTCP1	DHRS7	IGFBP3	B3GNT6	LOC100130506	KRT80
GRPEL2		MTIF3	DHX15	IGFBP7	B4GALNT1	LOC100130886	KRT81
GTF2F2		MXD3	DHX33	IL20RB	B4GALT5	LOC100130919	KTELC1
GTF2H2B		MXD4	DHX35	IL2RB	B4GALT7	LOC100131787	LAMP2
H1F0		MYH10	DNAJB1	INHBB	B9D1	LOC100132535	LANCL1
HACL1		MYOF	DNAJB6	IPO13	BACE2	LOC100134073	LFNG
HDDC3		NCAPG	DPH3	IRF3	BAD	LOC100134304	LMBRD1
HEATR1		NCAPG2	DPY19L1	IRF9	BAIAP2L1	LOC151162	LMO4
HEBP1		NEK2	DRAP1	ISG20	BAMBI	LOC203547	LOC100129681
HIST1H4K		NELF	DUSP1	ISOC1	BAT1	LOC387703	LOC100129882
HIST2H2AA4		NKD2	DUSP23	ISOC2	BAT2D1	LOC641844	LOC100130919
HIST2H2AC		NPC2	DYNC1I2	JAM3	BAT2L	LOC643031	LOC100131387
HLA-DMA		NRP1	DYNC1LI2	JUN	BAT4	LOC643310	LOC100131531
HMGCL		NUCKS1	DYRK4	JUND	BATF3	LOC643336	LOC100134073
HMGCR		NUMB	EFEMP2	KIAA0913	BBS2	LOC645638	LOC100134393
HMGCS1		NUPR1	EFHD2	KIAA1199	BCAS4	LOC647886	LOC151579
HMGN1		NUSAP1	EFR3A	KIAA1949	BCAT2	LOC648000	LOC286512
HNRNPA0		NXT1	EGR1	KLHL21	BCCIP	LOC652672	LOC387703
HNRNPA2B1		ODZ3	EHD4	KRT80	BCDIN3D	LOC727826	LOC388076
HNRNPC		OKL38	EIF1B	KRT81	BCKDHA	LOC729009	LOC388789
HOXC13		OLFML2A	EIF2A	KRTCAP2	BCS1L	LOC729148	LOC493869
HRASLS3		OLR1	EIF2AK2	KTI12	BECN1	LOC729580	LOC642989
HS.127310		OSR1	EIF2B2	LAMA4	BET1	LOC729992	LOC643031
HS.137971		P8	EIF2B3	LAMA5	BFAR	LOC730278	LOC644907
HS.176498		PAM	EIF2C2	LAPTM4B	BICD2	LOC731777	LOC646993
HS.213061		PAPOLA	EIF2S3	LAYN	BID	LOC732165	LOC647150
HS.390407		PBK	EIF3L	LDOC1	BIN1	LRRC26	LOC647886
HS.534680		PBX3	EIF4G2	LGALS3	BIRC5	LSM14A	LOC648210
HSBP1		PDGFRL	EIF4G3	LMNB1	BLCAP	LYPD1	LOC653658
HSD17B2		PDRG1	ELFN2	LMO4	BLMH	LYPD6B	LOC653773
HSP90AA1		PGRMC1	ELK1	LOC100008588	BLOC1S1	LYRM5	LOC653888
HSPA1B		PIGK	ELL2	LOC100128221	BLVRA	M160	LOC653994
HSPA9		PJA2	EMP1	LOC100128975	BLVRB	MANBA	LOC728590
HSPD1		PLAC8	ENY2	LOC100129195	BMI1	MAP3K1	LOC728877
HSPE1		PLAUR	EPDR1	LOC100129379	BMS1P5	MAT2A	LOC729646
HSPH1		PLK2	EPHA4	LOC100129543	BNIP2	MCM4	LOC729769
HTRA1		PLOD2	EPHB4	LOC100130154	BOK	MCM5	LOC730313
HTRA2		PLRG1	EPR1	LOC100130516	BOLA2	MCM6	LOC730316
HYAL3		POLE2	EPRS	LOC100130562	BOP1	MCTS1	LONP2
HYI		PPP2R3C	ERAP2	LOC100130835	BPHL	MELK	LPXN
IDH1		PPP2R5E	ETV5	LOC100132535	BPNT1	MESP1	LRRC26
IFI27L1		PPP4C	EXO1	LOC100132717	BRD3	METAP1	LSS
IFI27L2		PRICKLE1	EXOSC10	LOC100132774	BRD7	MGC3196	LY96
IFI35		PRKCDBP	FAHD2B	LOC100133328	BRD7P2	MGC39900	LYPD1
IFI6		PRPS1	FAM111A	LOC128192	BRI3	MGC40489	LYPD6B
IFITM1		PRSS23	FAM120A	LOC151162	BRI3BP	MGC87042	LYRM5
IFNGR1		PSMC1	FAM120B	LOC284023	BRI3P1	MGMT	MAD2L2
IFRD1		PSMC6	FAM131A	LOC387882	BRIX1	MIR1978	MAGOH
IGFBP3		PSME4	FAM168B	LOC388076	BRMS1	MRTO4	MARCKSL1
IGFBP4		PTEN	FAM20B	LOC389787	BRP44	MT1F	MCM3AP
IGFBP6		PTPRM	FAM3A	LOC391532	BRP44L	MT1G	MCTS1
IGFBP7		PURB	FAM43A	LOC402509	BRPF1	MTDH	MESP1
IGSF3		PVRL3	FAM58A	LOC440063	BRPF3	MTE	METAP2
IL6		PYGL	FAM62B	LOC441019	BRSK1	MYH10	METTL5
IL7R		QPRT	FAM82A2	LOC441377	BST2	MYL12A	MGC39900
ILVBL		RAB8A	FAM96A	LOC641768	BTBD1	NCL	MGC87042
IMPA2		RABAC1	FANCG	LOC642828	BTBD10	NCOA4	MIR1974
INO80B		RAP1GAP	FASN	LOC642989	BTBD12	NDUFA7	MIR1978
IPO11		RAP2A	FASTKD5	LOC643031	BTBD6	NEU1	MITD1
IRF9		RBCK1	FBXO28	LOC643790	BTF3	NNMT	MKI67IP
ISOC1		RBM45	FBXO31	LOC644330	BTG3	NOP58	MMGT1
ITPRIPL2		RBM47	FER1L3	LOC644615	BUB3	NR1H2	MRPL1
JAM3		RDH10	FGFRL1	LOC644760	BUD13	NSUN2	MRPL47
KBTBD2		RGS2	FHL3	LOC644914	BZW2	NUP205	MRPL48
KIAA0355		RHOBTB3	FIS1	LOC644936	C10orf35	NUP43	MRPL50
KLHL9		RIOK2	FKBP3	LOC645553	C11orf2	NUP88	MRPS22
KPNA4		RIPK2	FLJ43681	LOC647886	C11orf48	NUPR1	MRPS35
KPNB1		RNF165	FLNC	LOC650276	C11orf59	NUSAP1	MRTO4
KRT81		RPL36AL	FLOT1	LOC653226	C11orf60	OCEL1	MSX1
KRT86		RPS21	FLYWCH2	LOC653344	C11orf67	OCIAD2	MT1F
KTELC1		S100A16	FOSL1	LOC729102	C11orf68	ODZ3	MTCP1
LANCL1		S100A4	FSTL1	LOC729841	C11orf74	OKL38	MTE
LAPTM4B		SAT1	FTL	LOC730278	C12orf10	OLR1	MTF2
LARS		SCARB1	FTSJD2	LOC730525	C12orf32	PACSIN2	MYOF
LAYN		SCARB2	FUCA1	LOC731486	C12orf41	PAPD5	NCAPG
LEPROTL1		SCARNA9	G0S2	LOC731777	C12orf43	PARP1	NCBP1
LIMCH1		SCG2	G6PC3	LOXL1	C12orf44	PCNT	NDRG1
LMNB1		SDCBP	GADD45GIP1	LPXN	C12orf52	PDGFRL	NFE2L2
LMO4		SFRP1	GARS	LRP10	C12orf57	PELO	NFIL3
LOC100128252		SGK	GATC	LRRC47	C12orf59	PGD	NIT2
LOC100130835		SH3BGRL3	GBE1	LTBR	C12orf62	PLIN2	NKD2
LOC100132247		SH3GLB1	GBP2	MAPBPIP	C12orf65	POLD4	NNMT
LOC100132299		SHISA2	GCC1	MAPKAPK3	C13orf27	PPAP2A	NUP160
LOC100134073		SHPK	GDI1	MCM6	C13orf29	PPP2CA	NUPR1
LOC100134304		SIP1	GEMIN6	MEA1	C13orf34	PPP2R2A	OCIAD2
LOC151162		SIPA1L2	GGCX	MFGE8	C14orf112	PRDX2	OKL38
LOC203547		SIX4	GHDC	MFSD3	C14orf149	PRICKLE1	OSTF1
LOC25845		SLC16A2	GIPC1	MGC87042	C14orf166	PRKCDBP	P15RS
LOC285074		SLC30A7	GLIPR1	MGMT	C14orf32	PRKRIR	P8
LOC374395		SLC35A5	GLRX	MGST1	C14orf80	PROSC	PACSIN2
LOC387703		SLC43A2	GMFG	MGST2	C14orf85	PRR11	PAM
LOC388796		SLC7A11	GMPR2	MIR1974	C15orf23	PSMD6	PAPOLA
LOC389223		SLC7A5	GMPS	MIR1978	C15orf44	PSMG3	PAPSS2
LOC389787		SLC9A1	GNB2	MLLT11	C15orf57	PTDSS1	PBK
LOC400948		SLPI	GNB2L1	MMD	C16orf13	PUM1	PCNT
LOC402251		SNORD13	GNE	MMP13	C16orf42	QPRT	PCOLCE
LOC440063		SNRPB2	GNL2	MMP3	C16orf61	QSOX2	PDGFRB
LOC440353		SNTB1	GNPAT	MNT	C16orf63	RAB10	PGD
LOC441019		SOX18	GNS	MRPS33	C16orf68	RAB31	PGM3
LOC642489		SPOCD1	GORASP1	MSC	C16orf75	RABAC1	PHCA
LOC642975		SPPL2A	GOT1	MT1G	C16orf80	RAD21	PICALM
LOC644745		SRGN	GPKOW	MT2A	C16orf87	RARS	PIGK
LOC644762		SRP54	GPR175	MTE	C17orf106	RBL2	PJA2
LOC644799		SSFA2	GPR37	MX1	C17orf45	RBPMS2	PLAC8
LOC648024		STIL	GPSM2	MYH10	C17orf58	RFWD3	PLRG1
LOC649553		STMN3	GPSM3	MYLIP	C17orf59	RGL1	PLS3
LOC650369		STT3B	GRHPR	MYOF	C17orf61	RGS2	PMM2
LOC728635		SUZ12	GSK3B	NAV2	C17orf70	RHOBTB3	POLA1
LOC728672		SYNCRIP	GSTK1	NDE1	C17orf71	RNASEH1	POLE4
LOC729148		SYNJ2	GTF3A	NDRG1	C17orf90	ROD1	POM121C
LOC729200		SYT11	GUSB	NEU1	C17orf96	RPF2	PPCS
LOC729608		SYTL2	GYPC	NFIX	C17orf97	RPL15	PPP2R5E
LOC729843		TAX1BP1	H3F3B	NFKBIE	C18orf55	RRM1	PRKRIR
LOC730167		TBXAS1	HDAC3	NNMT	C18orf56	RSL1D1	PSMA3
LOC730278		TCEAL3	HEATR1	NOL3	C18orf8	RSPRY1	PSMC6
LOX		TH1L	HEATR6	NOV	C19orf10	RYBP	PSMD14
LPP		TIMP3	HEBP1	NP	C19orf2	S100A16	PSME4
LRP11		TINF2	HEBP2	NPC2	C19orf22	SAT1	PSMG3
LSM14A		TLE1	HINT2	NPLOC4	C19orf24	SC5DL	PTK2
LY96		TMCO3	HIST1H2BH	NR1H2	C19orf28	SCARB2	PVRL3
LYN		TMED10P	HIST1H4K	NT5C	C19orf42	SCARNA9	QDPR
LYPD1		TMED5	HLA-B	OAF	C19orf43	SCRN1	QPRT
MAPRE1		TMED7	HLA-DMB	OBFC2A	C19orf48	SEPT2	RAB3GAP1
MARCH7		TMEM166	HLA-E	OCEL1	C19orf50	SERPINB8	RABGGTB
MAT2A		TMEM179B	HLA-G	OKL38	C19orf53	SERPINE2	RAD51AP1
MATR3		TMEM48	HMGCR	OLFML2A	C19orf60	SET	RAP2A
MCCC1		TNC	HMGCS1	OLR1	C19orf70	SF3A3	RARRES3
MCM6		TNFRSF11B	HMGN4	PAFAH2	C1orf109	SFRP1	RBBP7
MED20		TOP2A	HNRNPA3	PAM	C1orf122	SFRS6	RBPMS2
METAP1		TPD52L2	HNRNPC	PANX2	C1orf123	SFXN1	RDX
MIR1978		TSPAN5	HNRPA1L-2	PBK	C1orf135	SH3BGRL3	RFC4
MIS12		TSPAN9	HNRPA1P4	PCCB	C1orf163	SIPA1L2	RGL1
MLLT11		TTK	HNRPC	PCMT1	C1orf174	SLC16A2	RHBDD2
MPI		TUBB2B	HNRPLL	PDE4A	C1orf19	SLC16A3	RHOBTB3
MRPL53		TUFT1	HNRPR	PDGFRL	C1orf198	SLC19A1	RND3
MRPS10		TUG1	HPRT1	PERP	C1orf31	SLC24A6	RNPEP
MRPS30		UBAP2L	HRASLS3	PHF10	C1orf41	SLC27A3	RPL39L
MSH6		UBE2Q2	Hs.127310	PHLDA1	C1orf43	SLC35F2	RPL7
MT1F		UBE2V2	Hs.137971	PHLDA2	C1orf50	SLC44A1	RPS19BP1
MTDH		UCKL1	Hs.193557	PHYH	C1orf52	SLC7A5	RPUSD3
MTE		UCP2	Hs.213061	PICK1	C1orf55	SLPI	RRM1
MTHFD1L		USO1	Hs.250648	PIN1	C1orf57	SMARCE1	S100A4
MTRF1L		VAMP7	Hs.279842	PINK1	C1orf74	SMCR7L	SAMM50
MXD3		WBP5	Hs.413494	PIR	C1orf77	SNORD13	SAP30
MYC		WDR20	Hs.497591	PITPNM1	C1orf97	SOCS2	SAR1B
MYL5		XPO1	Hs.571245	PLAC8	C1QL1	SPOCD1	SAT1
NAGK		YME1L1	Hs.572219	PLAU	C1QTNF6	SPRED1	SCD
NARS		YPEL5	Hs.579631	PLCD3	C1R	SPRYD4	SCG2
NBL1		ZFAND5	HSBP1	PNMA1	C1RL	SPSB2	SCOC
NCAPG		ZMPSTE24	HSD17B2	PNMA2	C20orf100	SQLE	SDAD1
NCBP1		ZNF148	HSP90AA1	PNPLA6	C20orf11	SRGN	SDCBP
NCL		ZNF22	HSP90B1	PNPLA7	C20orf111	SRP68	SDSL
NCOA4		ZYG11B	HSPA1A	POP1	C20orf127	SRPX	SEC13
NCRNA00085		ZZZ3	HSPA1B	PPAP2A	C20orf30	SRPX2	SEP15
NDUFA3			HSPA9	PPCS	C20orf43	STAT2	SERP1
NFE2L2			HSPBL2	PPOX	C20orf45	STAT6	SETMAR
NIPA1			HSPC157	PPP1R10	C20orf72	STEAP1	SF3B14
NOL11			HSPC171	PPP1R15A	C21orf33	STIL	SFRP1
NOP56			HSPH1	PPP2R2A	C21orf45	STRA6	SGSH
NOP58			HTRA2	PRAGMIN	C21orf56	STX5	SH3GLB1
NR1H3			IDS	PRKAB1	C21orf70	SUCLG2	SHISA2
NSMAF			IFI44	PRMT1	C22orf25	SUSD2	SLC19A1
NSUN2			IFT20	PRRX2	C22orf28	TACC1	SLC22A18AS
NUDT22			IGFBP2	PSAP	C22orf39	TAF10	SLC25A4
NUP107			IGFBP5	PSMB10	C2orf25	TAF6L	SLC30A9
NUP205			IGFBP6	PTMA	C2orf29	TAGLN	SLC35A5
NUP43			IK	PTPLA	C2orf32	TARS	SLC38A2
NUP88			IL6	PTPLB	C2orf47	TBXAS1	SLC7A5
NXT1			IL7R	PTPRM	C2orf49	TFPI2	SLPI
ODC1			IRF1	PUF60	C2orf56	TFRC	SMAD6
OLR1			IRF3	PYCR1	C2orf64	THY1	SMC4
OSBPL1A			ISCA2	PYGB	C2orf69	TIMP3	SND1
PABPC1L			ISOC1	RAB13	C2orf7	TINF2	SNORA10
PAFAH1B1			ITGA3	RAB30	C2orf70	TM2D1	SNORD13
PAICS			ITGAE	RAB32	C3orf10	TMEM179B	SNRNP27
PAK1IP1			ITGAV	RABAC1	C3orf18	TMEM69	SPARC
PANX2			ITGB3BP	RAD21	C3orf19	TMEM8	SPATA20
PARN			JARID1A	RAET1G	C3orf21	TMEM97	SPCS3
PAXIP1			KATNB1	RAGE	C3orf26	TMSB15A	SRGN
PCNA			KBTBD2	RBPMS2	C3orf31	TOMM20	SRM
PCNT			KDELC2	RCN3	C3orf34	TP53TG1	SRP54
PDXDC1			KIAA0194	RFTN1	C3orf38	TPX2	SRPK1
PGLS			KIAA0355	RGS17	C3orf54	TRAFD1	SSR1
PIGU			KIAA0494	RGS2	C3orf59	TRAPPC2P1	STC1
PLAC8			KIAA1539	RHBDL3	C3orf72	TRIP13	STC2
PLAU			KIAA1949	RIN2	C4orf34	TRMT112	STIL
PLAUR			KIF20A	RNASEH2A	C4orf48	TRRAP	STRA13
PLRG1			KLF2	RND3	C5orf15	TSKU	STS-1
PNKP			KLF9	RNF130	C5orf32	TTF2	STYXL1
POLB			KLHDC2	ROBLD3	C6orf126	TUBB2B	SUCLG2
POLD4			KLHDC8B	RP11-529I10.4	C6orf153	TUG1	SULT1A2
PPM1M			KLHL9	RPA2	C6orf173	TWIST1	SUPT16H
PPP2CA			KPNA6	RPS4Y1	C7orf20	TXNIP	SUSD2
PPP2R2A			KRBA1	RRS1	C7orf23	UCHL1	SYTL2
PPP3R1			KRT80	RSL1D1	C7orf26	UCP2	TARS
PPP4R1			KRTCAP2	S100A3	C7orf28A	UGCG	TBC1D15
PPPDE1			KYNU	S100A4	C7orf28B	UGDH	TCEAL3
PRDX3			LAGE3	SAT1	C7orf40	UIMC1	TFAP2C
PRKCDBP			LAMA5	SCD	C7orf41	UQCRC2	TFRC
PRKRIR			LAMB1	SDF2L1	C7orf44	UTP6	THBS1
PRNP			LAMC1	SDHAP2	C7orf47	VAMP3	THOC2
PRPS1			LANCL1	SEC14L2	C7orf50	VCAM1	THY1
PRPSAP2			LARP4B	SEPT3	C7orf55	VEZF1	TIMP3
PRRT3			LARP6	SERPINB8	C8orf33	WDR12	TINF2
PRRX2			LARS	SERPINE2	C8orf55	WDR75	TM2D1
PSMD1			LCMT2	SERTAD1	C8orf59	XPO5	TMED5
PSMD14			LEPREL1	SERTAD2	C8orf76	XPO7	TMED7
PTGES3			LGALS3	SF3A2	C9orf103	XRCC5	TMEM126B
PTMS			LIMCH1	SFRP1	C9orf127	XRCC6	TMEM141
PTPN11			LIPA	SFRS5	C9orf142	YIPF3	TMEM158
PTPRK			LMNB1	SFRS6	C9orf16	ZNF828	TMEM2
PURB			LOC100128060	SFXN1	C9orf23	ZRANB2	TMEM43
QPRT			LOC100128731	SGSH	C9orf30	ZW10	TMEM59
QSOX2			LOC100128975	SH2B3	C9orf40		TMEM90B
RAB10			LOC100129028	SH3BGRL3	C9orf46		TMSB15A
RAB11FIP5			LOC100129362	SH3BP4	C9orf75		TNFRSF11B
RAB31			LOC100129379	SH3GLB1	C9orf78		TNFRSF21
RABAC1			LOC100129543	SHROOM2	C9orf89		TNS3
RAD21			LOC100129553	SIPA1L2	C9orf9		TOP2A
RALA			LOC100129599	SLC12A8	CAB39		TTK
RAP1GAP			LOC100129681	SLC16A2	CACNB3		TTLL12
RARRES3			LOC100129742	SLC1A7	CADM1		TTYH3
RARS			LOC100129758	SLC22A18AS	CALD1		TUBB2B
RBBP9			LOC100130003	SLC24A6	CALM1		TXNDC9
RFWD3			LOC100130123	SLC25A23	CALU		UBQLN1
RGL1			LOC100130178	SLC25A29	CAMK2G		UBXN4
RHBDL3			LOC100130308	SLC2A1	CAMSAP1		UCHL1
RHOBTB3			LOC100130446	SLC35C1	CANX		UCP2
RIN2			LOC100130835	SLC35E1	CAP1		UQCRH
RNASEH1			LOC100130886	SLC35E3	CAP2		USP38
RNF114			LOC100130980	SLPI	CAPZA2		VAMP7
RNF24			LOC100131787	SNAI2	CARHSP1		VASN
ROD1			LOC100131971	SNHG6	CASC3		VPS35
RPA1			LOC100132199	SNORD13	CATSPER1		WBP5
RPF2			LOC100132291	SOSTDC1	CAV1		WBSCR22
RPL15			LOC100132299	SOX4	CBLL1		XPO1
RQCD1			LOC100132457	SPHK2	CBX1		XRCC6
RRM1			LOC100132499	SPOCD1	CBX5		YIPF6
RSL1D1			LOC100132535	SPRY1	CBX6		YPEL5
RSPRY1			LOC100132564	SPTAN1	CCDC106		ZAK
RTN4IP1			LOC100133372	SQLE	CCDC109A		ZC3H5
RYBP			LOC100134073	SRPX	CCDC124		ZFR
S100A11			LOC100134273	ST3GAL1	CCDC127		ZFYVE19
S100A16			LOC100134537	STAMBPL1	CCDC130		ZNF148
S100A4			LOC124512	STAT2	CCDC16		ZNF22
SAT1			LOC128192	STEAP1	CCDC21		ZNF362
SCARB2			LOC148430	STS-1	CCDC22		ZRANB2
SCD			LOC151162	SUSD2	CCDC23		ZZZ3
SCG2			LOC203547	SYTL2	CCDC28A
SCRN1			LOC284393	TAF15	CCDC34
SDHAP2			LOC338870	TAGLN	CCDC43
SDSL			LOC387703	TBCE	CCDC58
SEC23B			LOC387882	TFAP2C	CCDC59
SEPT2			LOC388076	TFE3	CCDC6
SEPT3			LOC388275	TFPI2	CCDC77
SERTAD1			LOC389156	TGFBI	CCDC85B
SERTAD2			LOC389286	TIMP3	CCDC92
SET			LOC389342	TIMP4	CCL2
SFRP1			LOC389787	TINF2	CCL26
SFRS10			LOC391019	TMBIM1	CCNA2
SFRS6			LOC391833	TMBIM4	CCNB1
SH3BGRL3			LOC401397	TMED10P	CCNB2
SHPK			LOC401676	TMEM118	CCNC
SLC12A8			LOC440063	TMEM158	CCND1
SLC19A1			LOC440704	TMEM166	CCNF
SLC22A18AS			LOC440991	TMEM173	CCNI
SLC25A13			LOC441154	TMEM177	CCNK
SLC25A36			LOC441377	TMEM44	CCS
SLC35F2			LOC442454	TMEM48	CCT2
SLC38A2			LOC641768	TMEM59	CCT3
SLC44A1			LOC641848	TMSB15A	CCT4
SLC7A1			LOC642197	TNFRSF21	CCT5
SLC7A5			LOC642784	TNNT1	CCT6A
SLPI			LOC642828	TOMM20	CCT8
SMARCC1			LOC642989	TOR3A	CD151
SMUG1			LOC643031	TPRG1L	CD24
SNHG1			LOC643790	TRABD	CD2BP2
SNORA61			LOC644029	TRAM2	CD320
SNORA67			LOC644330	TRAPPC2P1	CD3EAP
SNORD13			LOC644774	TSPAN9	CD44
SNRPB2			LOC644799	TUBA4A	CD70
SNTB1			LOC644914	TUBB2B	CD99
SNX27			LOC644928	TXNIP	CD99L2
SNX5			LOC644936	UAP1L1	CDC123
SOX18			LOC644937	UBA1	CDC16
SPATA20			LOC645138	UBE2E1	CDC2
SPOCD1			LOC645157	UCHL3	CDC20
SPRYD3			LOC645166	UCN2	CDC23
SPSB2			LOC645638	UCP2	CDC25A
SRPK1			LOC645979	ULBP2	CDC25C
SRPR			LOC646463	UQCC	CDC2L2
SRXN1			LOC646527	VASN	CDC34
SSR1			LOC646672	VAT1	CDC42EP2
SSSCA1			LOC646966	VIL2	CDC42EP5
ST3GAL2			LOC647030	VIT	CDC45L
STAT6			LOC647285	VPS37B	CDCA3
STK36			LOC647302	XAB2	CDCA4
STK4			LOC647886	YIPF3	CDCA7
STRADB			LOC648000	ZBTB45	CDCA8
STX16			LOC648638	ZC3H5	CDH15
SURF1			LOC649076	ZDHHC1	CDH2
SUZ12			LOC651202	ZDHHC18	CDH6
SYT11			LOC651697	ZFP36	CDK2
TACC1			LOC653147	ZFP36L1	CDK2AP1
TAF10			LOC653156	ZIC2	CDK2AP2
TAPBPL			LOC653658	ZNF324	CDK6
TARS			LOC653773	ZNF488	CDK7
TAX1BP1			LOC653888	ZYX	CDKN1B
TBXAS1			LOC727865		CDR2
TCFL5			LOC728031		CDR2L
TCTA			LOC728069		CDS2
TDG			LOC728244		CDV3
TEX264			LOC728431		CEBPA
TFAM			LOC728532		CEBPB
TFB2M			LOC728590		CEBPD
TFRC			LOC728643		CEBPZ
TGM2			LOC728658		CECR5
TH1L			LOC728791		CELSR3
TIMP3			LOC728823		CEND1
TIMP4			LOC728873		CENPA
TINF2			LOC728973		CENPL
TIPARP			LOC729009		CENPN
TLE4			LOC729101		CENTA1
TMEM134			LOC729102		CENTG2
TMEM136			LOC729148		CERCAM
TMEM141			LOC729208		CERK
TMEM173			LOC729301		CES2
TMEM179B			LOC729340		CETN2
TMEM187			LOC729646		CFD
TMEM194A			LOC729708		CFDP1
TMEM41B			LOC729769		CGGBP1
TMEM42			LOC729841		CHAF1A
TMEM87A			LOC729843		CHAF1B
TNFRSF14			LOC730255		CHCHD1
TOMM20			LOC730278		CHCHD10
TP53RK			LOC730313		CHCHD2
TRAM2			LOC730324		CHCHD3
TRIM44			LOC731777		CHCHD5
TRIP12			LOC732165		CHCHD6
TRPM4			LOC92659		CHCHD7
TSPAN31			LOX		CHCHD8
TSTA3			LPAR1		CHCHD9
TTC15			LPP		CHD1L
TTF2			LPXN		CHD4
TUBB2B			LRP10		CHD8
TUFT1			LRRC47		CHEK1
TUG1			LRWD1		CHERP
TXNDC5			LSM1		CHMP1B
UBE2G1			LSM14A		CHMP4A
UBE2N			LSM3		CHMP6
UBE3A			LUZP1		CHP
UBXN4			LY6E		CHRNA5
UCP2			LY96		CHST15
UGCG			LYPD1		CHSY1
UNC84A			LYRM5		CHUK
UQCRC2			LZTR1		CIAO1
USP10			M160		CIAPIN1
VASN			MAP2K1		CICE
VEZF1			MAPK12		CIP29
VPS28			MARCH6		CIRH1A
VPS35			MAT2A		CITED2
WDR12			MATR3		CKB
WDR25			MCEE		CKS1B
WDR70			MCTS1		CLCF1
XPO1			MDP1		CLCN7
XPO5			MEA1		CLDND1
XPO7			MED28		CLDND2
XRCC5			MED30		CLEC16A
YTHDF1			MFSD5		CLIC1
YWHAB			MGC87042		CLIC4
YWHAG			MGEA5		CLINT1
ZDHHC12			MGST1		CLIP3
ZFP36			MGST3		CLNS1A
ZFR			MID1IP1		CLP1
ZNF217			MIR1974		CLPP
ZNF828			MIR1978		CMAS
ZRANB2			MKRN1		CMBL
ZW10			MLF2		CMC1
			MNAT1		CMPK1
			MNT		CMTM4
			MOBK1B		CMTM6
			MOBKL1B		CNBP
			MRPL13		CNIH
			MRPL15		CNKSR3
			MRPL30		CNN3
			MRPL33		CNOT2
			MRPL40		CNOT8
			MRPS10		CNRIP1
			MRPS28		COASY
			MRPS33		COG2
			MSH6		COG4
			MSRA		COIL
			MSX1		COL1A2
			MTCP1		COL4A1
			MTRF1L		COL4A2
			MX1		COL5A1
			MYH10		COL5A2
			MYL12A		COL6A3
			NCL		COMMD1
			NCOA4		COMMD10
			NCRNA00219		COMMD3
			NDUFAB1		COMT
			NDUFAF2		COMTD1
			NFE2L2		COPA
			NFKBIE		COPB1
			NINJ1		COPB2
			NIPA1		COPE
			NKD2		COPS3
			NNMT		COPS4
			NP		COPS5
			NPAS1		COPZ1
			NPC2		COPZ2
			NQO1		COQ10B
			NR1H2		COQ2
			NRD1		COQ3
			NRGN		COQ5
			NUCKS1		CORO1A
			NUDT18		CORO1B
			NUDT2		CORO1C
			NUP133		COX10
			NUP160		COX15
			NUP43		COX17
			NUP88		COX4NB
			NUSAP1		COX5B
			OAF		COX6C
			OCEL1		COX7A2L
			OCIAD2		COX8A
			ODZ3		CPNE3
			OKL38		CPOX
			OLR1		CPSF1
			OSBP		CPSF3
			OSTF1		CPT2
			PA2G4		CRBN
			PAFAH1B1		CREB3
			PAFAH1B3		CREB3L2
			PALLD		CRELD2
			PAM		CRIP2
			PAPD5		CRIPT
			PAPSS1		CRISPLD2
			PARN		CRK
			PARP12		CRKL
			PCGF1		CRLF1
			PCGF2		CRTC3
			PCNT		CRYBB2
			PCTP		CRYZ
			PDGFRL		CRYZL1
			PFDN5		CSE1L
			PGK1		CSF2
			PHB2		CSNK1A1
			PHCA		CSNK2A1
			PHLDA1		CSNK2A1P
			PIGU		CSTF2
			PINK1		CSTF3
			PISD		CTDSP2
			PKM2		CTDSPL
			PLAU		CTGF
			PLEKHG3		CTGLF7
			PLEKHH3		CTNNA1
			PLOD2		CTNNAL1
			PLOD3		CTNNB1
			PLRG1		CTNNBL1
			PMEPA1		CTPS
			PMS2L5		CTSB
			PNPLA2		CTSC
			PNPLA7		CTSD
			POGK		CTSF
			POLE4		CTSL1
			POLR1C		CTTN
			POLR2D		CUEDC2
			POLR2J		CUL1
			POLR2J3		CUL2
			POLR3GL		CUL4A
			PPCS		CUTC
			PPIH		CWC15
			PPP2CA		CWF19L1
			PPP2CB		CX3CL1
			PPPDE1		CXorf26
			PRDX3		CXorf56
			PRICKLE1		CXorf64
			PRKDC		CXXC5
			PRPF31		CYB561D2
			PRR11		CYB5A
			PSMA2		CYB5B
			PSMA3		CYB5D1
			PSMB2		CYBASC3
			PSMB9		CYBRD1
			PSMC2		CYC1
			PSMD1		CYGB
			PSME2		CYHR1
			PSME4		CYP26B1
			PTCD1		CYP4F11
			PTGES3		CYR61
			PTMA		CYTL1
			PTMS		DAG1
			PTPLA		DAP3
			PUM1		DARS
			PURB		DARS2
			QDPR		DAZAP2
			QPRT		DBI
			RAB10		DBNDD2
			RAB26		DBNL
			RAB31		DCAF7
			RAB36		DCI
			RAB5C		DCTD
			RABAC1		DCTN5
			RAD21		DCUN1D3
			RAGE		DCUN1D5
			RAI14		DCXR
			RARRES2		DDA1
			RARS		DDIT3
			RASL11A		DDIT4
			RBBP7		DDRGK1
			RBL2		DDX1
			RBM42		DDX18
			RBMX2		DDX19A
			REEP5		DDX19B
			RFWD3		DDX23
			RGL1		DDX24
			RHBDD2		DDX27
			RHOA		DDX39
			RHOB		DDX42
			RHOBTB3		DDX47
			RILPL1		DDX5
			RNASEH1		DDX55
			RNF123		DDX56
			RNF181		DECR1
			RNU4ATAC		DEDD
			ROD1		DEDD2
			RP11-529I10.4		DEF8
			RPA1		DEGS1
			RPL14L		DEK
			RPL15		DENND4B
			RPL18		DENND5A
			RPL23		DENR
			RPL26L1		DERA
			RPL34		DERL1
			RPL7		DERL2
			RPL9		DET1
			RPN2		DFNA5
			RPS25		DGAT1
			RPS26L		DGCR14
			RPS6KA4		DGCR6
			RRAS		DGCR6L
			RRM1		DGCR8
			RRM2		DGUOK
			RSL1D1		DHCR24
			RSPRY1		DHCR7
			RYBP		DHPS
			S100A4		DHRS11
			SAFB		DHRS13
			SAP30		DHRS2
			SAP30L		DHRS7
			SAPS3		DHX15
			SAT1		DHX33
			SC5DL		DHX35
			SCARB2		DHX40
			SCD		DIAPH1
			SCG2		DIMT1L
			SCRN1		DIP2B
			SCYL1		DIRC2
			SDF2		DIS3L
			SDHAF2		DKC1
			SDHD		DKFZp434N035
			SDSL		DKK3
			SEC23B		DLG4
			SEC31A		DLST
			SELK		DLX1
			SELM		DNAJA1
			SEMA6A		DNAJA2
			SEP15		DNAJB11
			SEPT2		DNAJB6
			SEPT3		DNAJB9
			SEPW1		DNAJC7
			SF3A3		DNAJC8
			SF3B14		DNAJC9
			SFRS15		DNASE2
			SFRS6		DNCL1
			SFRS9		DNLZ
			SFT2D1		DNMT1
			SH3BGRL3		DNPEP
			SHFM1		DNTTIP1
			SHISA2		DPH5
			SHISA5		DPM1
			SIGMAR1		DPP3
			SIPA1L2		DPP7
			SIVA		DPY19L1
			SIVA1		DPY30
			SLC22A18AS		DPYSL2
			SLC25A29		DPYSL3
			SLC27A1		DR1
			SLC30A7		DRAP1
			SLC35B2		DRG1
			SLC35C1		DSCC1
			SLC44A1		DSCR3
			SLC44A3		DSN1
			SLC45A3		DSTN
			SLC4A2		DUS2L
			SLC5A6		DUS3L
			SLC7A11		DUSP1
			SLC7A5		DUSP10
			SLIT2		DUSP12
			SLPI		DUSP14
			SMO		DUSP22
			SMUG1		DUSP23
			SNHG5		DUSP3
			SNORA12		DUSP5
			SNORA62		DUT
			SNORA67		DVL3
			SNRPD3		DYM
			SNX17		DYNC1I2
			SNX27		DYNC1LI2
			SNX5		DYNLL1
			SNX8		E2F2
			SON		E2F3
			SP1		EARS2
			SPATS2L		EBNA1BP2
			SPOCD1		ECD
			SPR		ECM1
			SPRED1		ECOP
			SPRY2		ECSIT
			SPSB2		EDEM2
			SRGN		EDF1
			SRP68		EEF1A1
			SRPX		EEF1AL7
			SRPX2		EEF1B2
			SSBP1		EEF1D
			SSH2		EEF2
			ST6GALNAC4		EEF2K
			STAG3L3		EFCAB4A
			STAT6		EFEMP2
			STC2		EFHA1
			STIL		EFHD1
			STK4		EFR3A
			STRADB		EFTUD2
			SUMO2		EI24
			SUPT16H		EID2
			SUPT4H1		EID2B
			SURF1		EIF2A
			SUV39H1		EIF2AK2
			TACC1		EIF2B1
			TAF10		EIF2B2
			TAP1		EIF2B3
			TAPBPL		EIF2C1
			TARBP2		EIF2C2
			TARS		EIF2S1
			TAX1BP1		EIF2S3
			TBC1D10A		EIF3B
			TBL1X		EIF3CL
			TBL2		EIF3D
			TBXAS1		EIF3E
			TCEAL8		EIF3G
			TDG		EIF3H
			TERC		EIF3I
			TESK1		EIF3J
			TFPI2		EIF3L
			TFRC		EIF3M
			TGOLN2		EIF4A2
			THAP11		EIF4A3
			THBS1		EIF4B
			TIGA1		EIF4EBP1
			TIGD5		EIF4EBP2
			TIMM17B		EIF4ENIF1
			TIMP4		EIF4G2
			TIPARP		EIF4G3
			TMEM100		EIF4H
			TMEM119		EIF6
			TMEM136		ELAC2
			TMEM140		ELF1
			TMEM147		ELF4
			TMEM14B		ELK1
			TMEM158		ELL2
			TMEM181		ELOVL5
			TMEM194A		ELP2
			TMEM41B		ELP3
			TMEM48		EML4
			TMEM55B		EMP3
			TMEM69		ENDOG
			TMEM87A		ENO2
			TMEM90B		ENOPH1
			TMSB15A		EPAS1
			TMSL3		EPDR1
			TMUB1		EPHX1
			TNFRSF11B		EPPB9
			TNFRSF21		EPRS
			TNPO1		ERAP2
			TOMM20		ERCC1
			TOMM6		ERCC3
			TOR1AIP1		ERGIC3
			TP53BP2		ERH
			TP53RK		ERI1
			TPX2		ERI3
			TRAM1		ERICH1
			TRIM26		ERRFI1
			TRIM4		ESPL1
			TRIM44		ESRRA
			TRIM56		ESRRAP2
			TRIP6		ETF1
			TSR2		ETFA
			TTC15		ETHE1
			TTC31		ETS1
			TTF2		ETS2
			TUG1		ETV4
			TUSC1		EWSR1
			TUSC4		EXOSC1
			TYRO3		EXOSC10
			UBFD1		EXOSC2
			UBXN4		EXOSC3
			UCHL3		EXOSC4
			UCP2		EXOSC5
			UGCG		EXOSC6
			UPLP		EXOSC7
			UQCRH		EXOSC8
			USP13		EXT1
			USP24		EXT2
			VAMP3		EXTL3
			VAMP5		EZH2
			VAT1		F12
			VEZF1		F2R
			VGF		F2RL1
			VKORC1L1		F3
			VPS35		F8A1
			VPS37D		FADD
			WBSCR22		FADS1
			WDR13		FADS2
			WIBG		FAF2
			WNT5A		FAHD2A
			XAB2		FAHD2B
			XRCC3		FAM100B
			XRCC5		FAM103A1
			XRCC6		FAM104A
			YDJC		FAM105B
			YIPF3		FAM108C1
			YWHAB		FAM109B
			ZCCHC14		FAM111A
			ZCCHC17		FAM120A
			ZFP36		FAM120AOS
			ZFP91		FAM120B
			ZFYVE21		FAM125A
			ZNF207		FAM131A
			ZNF212		FAM133B
			ZNF217		FAM136A
			ZNF22		FAM13B
			ZNF263		FAM158A
			ZNF282		FAM171A1
			ZNF410		FAM173A
			ZNF511		FAM175A
			ZNF524		FAM175B
			ZNF581		FAM176B
			ZNHIT1		FAM195A
			ZNRD1		FAM195B
			ZW10		FAM20B
			ZYG11B		FAM32A
			ZYX		FAM3A
					FAM45A
					FAM46A
					FAM60A
					FAM62B
					FAM69B
					FAM83D
					FAM89B
					FAM92A1
					FAM98A
					FAM98C
					FANCG
					FARP1
					FARSA
					FASN
					FASTK
					FASTKD5
					FAT1
					FBL
					FBLN7
					FBXL11
					FBXL15
					FBXL20
					FBXL6
					FBXO28
					FBXO31
					FBXO33
					FBXO5
					FBXO7
					FBXW2
					FBXW4
					FCGRT
					FDFT1
					FDPS
					FDX1L
					FEN1
					FER1L3
					FERMT2
					FEZ2
					FH
					FHL1
					FHL3
					FIBP
					FIS1
					FJX1
					FKBP10
					FKBP11
					FKBP14
					FKBP2
					FLJ10081
					FLJ10986
					FLJ14166
					FLJ20021
					FLJ20718
					FLJ22795
					FLJ25404
					FLJ35390
					FLJ35767
					FLJ39827
					FLNB
					FLNC
					FLOT1
					FLT3LG
					FLYWCH2
					FNBP1
					FNTA
					FNTB
					FOSL1
					FOXA1
					FOXC1
					FOXD1
					FOXF1
					FOXF2
					FOXJ2
					FOXJ3
					FOXRED2
					FRAP1
					FRG1
					FSTL1
					FSTL3
					FTH1
					FTSJ3
					FUCA1
					FUZ
					FXR2
					FZD2
					FZD7
					G3BP1
					G3BP2
					G6PC3
					GABARAPL2
					GAD1
					GADD45A
					GADD45B
					GADD45GIP1
					GALK1
					GALNT11
					GALT
					GANAB
					GAPDH
					GAPDHL6
					GAPVD1
					GARS
					GART
					GATC
					GBA
					GBE1
					GCHFR
					GCN1L1
					GDF15
					GDI2
					GEMIN4
					GFM1
					GGA2
					GGH
					GHDC
					GHITM
					GINS2
					GINS3
					GINS4
					GIPC1
					GIYD1
					GJA1
					GLA
					GLDN
					GLG1
					GLI4
					GLIPR2
					GLO1
					GLOD4
					GLRX3
					GLTP
					GLTSCR1
					GLTSCR2
					GLUD1
					GMCL1
					GMDS
					GMFB
					GMPPA
					GMPR2
					GMPS
					GNB1
					GNB1L
					GNB2
					GNB5
					GNE
					GNG10
					GNL1
					GNL2
					GNL3
					GNL3L
					GNPAT
					GNPDA1
					GNS
					GOLGA3
					GOLGA7
					GOLPH3
					GORASP2
					GOT2
					GPAA1
					GPATCH3
					GPD1L
					GPI
					GPKOW
					GPN1
					GPN2
					GPR108
					GPR137
					GPR172A
					GPR175
					GPR177
					GPR89B
					GPR89C
					GPRC5A
					GPS1
					GPX3
					GPX4
					GPX8
					GRAMD1A
					GRK6
					GRPEL2
					GRWD1
					GSDMD
					GSG2
					GSK3B
					GSPT1
					GSPT2
					GSR
					GSS
					GTF2A2
					GTF2B
					GTF2E2
					GTF2F2
					GTF2H2B
					GTF2H3
					GTF2IP1
					GTF3A
					GTF3C1
					GTF3C2
					GTPBP4
					GTPBP8
					GTSE1
					GYG1
					GYPC
					H1F0
					H2AFY
					H2AFZ
					H3F3A
					H3F3B
					HACL1
					HADH
					HADHA
					HADHB
					HAGH
					HARS2
					HAUS8
					HCCA2
					HCCS
					HCFC1
					HCFC1R1
					HDAC1
					HDAC11
					HDDC2
					HDDC3
					HDGFRP3
					HDHD2
					HDHD3
					HEATR1
					HEATR6
					HEBP1
					HECTD3
					HEG1
					HERPUD1
					HES4
					HES6
					HEXB
					HEXIM2
					HIAT1
					HIATL1
					HIBADH
					HIBCH
					HINT2
					HIPK2
					HIST1H1C
					HIST1H2AC
					HIST1H2BH
					HIST1H4J
					HIST1H4K
					HJURP
					HLA-B
					HLA-DMB
					HLA-E
					HLA-G
					HMGB1L1
					HMGB2
					HMGCR
					HMGCS1
					HMGN1
					HMGN2
					HMGN4
					HMMR
					HMOX1
					HN1
					HN1L
					HNRNPA0
					HNRNPA1
					HNRNPA3
					HNRNPC
					HNRNPD
					HNRNPH1
					HNRNPK
					HNRNPM
					HNRNPR
					HNRNPUL2
					HNRPA1L-2
					HNRPA1P4
					HNRPA2B1
					HNRPH1
					HNRPK
					HNRPLL
					HNRPR
					HNRPUL1
					HOMER3
					HOXA5
					HOXC13
					HOXC8
					HOXD11
					HPCAL1
					HPRT1
					HPS6
					Hs.127310
					Hs.137971
					Hs.163752
					Hs.190748
					Hs.213061
					Hs.213541
					Hs.250648
					Hs.25892
					Hs.286666
					Hs.355933
					Hs.369017
					Hs.374257
					Hs.413494
					Hs.430851
					Hs.475334
					Hs.528284
					Hs.531457
					Hs.534680
					Hs.538535
					Hs.545589
					Hs.556082
					Hs.562219
					Hs.567759
					Hs.568741
					Hs.57079
					Hs.576633
					Hs.579631
					Hs.98330
					HS1BP3
					HSBP1
					HSD17B11
					HSD17B12
					HSD17B14
					HSD17B4
					HSP90AA1
					HSP90AB1
					HSP90B1
					HSPA1A
					HSPA1B
					HSPA5
					HSPA8
					HSPA9
					HSPB8
					HSPC171
					HSPD1
					HSPH1
					HTRA1
					HTRA2
					HYAL3
					IAH1
					IARS2
					ICAM3
					ICOSLG
					ID1
					ID2
					ID3
					IDH1
					IDH2
					IDH3A
					IER5L
					IFI27L1
					IFI27L2
					IFI35
					IFITM1
					IFITM3
					IFNGR1
					IFNGR2
					IFP38
					IFRD2
					IGBP1
					IGF2BP2
					IGF2R
					IGFBP2
					IGFBP3
					IGFBP4
					IGFBP5
					IGFBP6
					IGFBP7
					IK
					IL10RB
					IL13RA1
					IL2RB
					IL6
					IL8
					ILF2
					ILF3
					ILVBL
					IMMT
					IMP4
					IMPA2
					IMPAD1
					IMPDH2
					INF2
					ING2
					INO80B
					INSIG1
					INTS10
					INTS12
					INTS3
					INTS9
					IPO11
					IPO9
					IRF2BP2
					IRF3
					IRX2
					IRX5
					ISCA1
					ISG15
					ISG20
					ISG20L2
					ISOC1
					ISOC2
					ISYNA1
					ITGA3
					ITGAV
					ITGB4BP
					ITM2C
					ITPKA
					ITPR3
					ITPRIPL2
					JAM3
					JARID1A
					JOSD1
					JOSD2
					JUN
					JUND
					KANK2
					KARS
					KAT2A
					KBTBD2
					KCNS3
					KCTD10
					KCTD11
					KCTD14
					KDELC1
					KDELC2
					KDELR3
					KDM3B
					KHDRBS1
					KIAA0090
					KIAA0101
					KIAA0146
					KIAA0174
					KIAA0182
					KIAA0196
					KIAA0355
					KIAA0406
					KIAA0430
					KIAA0556
					KIAA0892
					KIAA0907
					KIAA1267
					KIAA1310
					KIAA1539
					KIAA2013
					KIF20A
					KIF23
					KIF2C
					KIF3B
					KIFC1
					KIFC2
					KLC1
					KLF2
					KLF9
					KLHDC2
					KLHDC8B
					KLHL12
					KLHL21
					KLHL22
					KLHL36
					KLHL5
					KLHL9
					KPNA2
					KPNA4
					KPNA6
					KPNB1
					KRT18P28
					KRT75
					KRT8
					KRT80
					KRT81
					KRT86
					KRTCAP2
					KTELC1
					KYNU
					LACTB
					LAMB1
					LAMC1
					LAMP2
					LANCL1
					LAP3
					LAPTM4B
					LAPTM5
					LARP4B
					LARP6
					LARS
					LAS1L
					LASS2
					LBH
					LCMT1
					LCMT2
					LDHA
					LDHB
					LDLR
					LDOC1L
					LEF1
					LEMD3
					LEPRE1
					LEPREL1
					LEPREL2
					LEPROT
					LEPROTL1
					LGALS3
					LGTN
					LHX2
					LIMS1
					LIPA
					LITAF
					LMAN2L
					LMBR1
					LMBRD1
					LMNB1
					LMO4
					LOC100008588
					LOC100008589
					LOC100128060
					LOC100128084
					LOC100128086
					LOC100128252
					LOC100128266
					LOC100128288
					LOC100128353
					LOC100128410
					LOC100128936
					LOC100129028
					LOC100129158
					LOC100129211
					LOC100129362
					LOC100129379
					LOC100129585
					LOC100129599
					LOC100129673
					LOC100129681
					LOC100129742
					LOC100129781
					LOC100129882
					LOC100129902
					LOC100130070
					LOC100130123
					LOC100130506
					LOC100130511
					LOC100130516
					LOC100130562
					LOC100130633
					LOC100130707
					LOC100130835
					LOC100130886
					LOC100130919
					LOC100131196
					LOC100131336
					LOC100131387
					LOC100131531
					LOC100131572
					LOC100131609
					LOC100131735
					LOC100131785
					LOC100131787
					LOC100131866
					LOC100132032
					LOC100132037
					LOC100132247
					LOC100132291
					LOC100132299
					LOC100132391
					LOC100132394
					LOC100132499
					LOC100132535
					LOC100132547
					LOC100132564
					LOC100132673
					LOC100132717
					LOC100132727
					LOC100132774
					LOC100133012
					LOC100133328
					LOC100133372
					LOC100133390
					LOC100133489
					LOC100133836
					LOC100133999
					LOC100134134
					LOC100134189
					LOC100134273
					LOC100134304
					LOC100134393
					LOC100134424
					LOC100134537
					LOC100134868
					LOC113386
					LOC127295
					LOC128192
					LOC134997
					LOC136143
					LOC143666
					LOC146517
					LOC146909
					LOC148915
					LOC150223
					LOC151162
					LOC151579
					LOC158345
					LOC201175
					LOC203547
					LOC205251
					LOC220433
					LOC255783
					LOC284167
					LOC285053
					LOC285074
					LOC285900
					LOC286016
					LOC286444
					LOC338758
					LOC339352
					LOC339804
					LOC341315
					LOC341457
					LOC346950
					LOC347292
					LOC347376
					LOC347544
					LOC387703
					LOC388275
					LOC388344
					LOC388556
					LOC388564
					LOC388654
					LOC388789
					LOC388796
					LOC389049
					LOC389137
					LOC389168
					LOC389223
					LOC389322
					LOC389404
					LOC389672
					LOC390345
					LOC390354
					LOC390466
					LOC390735
					LOC391019
					LOC391075
					LOC391126
					LOC391532
					LOC391578
					LOC391777
					LOC391833
					LOC392285
					LOC392522
					LOC399748
					LOC399942
					LOC399965
					LOC400027
					LOC400455
					LOC400506
					LOC400890
					LOC400948
					LOC401115
					LOC401206
					LOC401238
					LOC401397
					LOC401676
					LOC402112
					LOC402251
					LOC402644
					LOC439953
					LOC440043
					LOC440063
					LOC440311
					LOC440595
					LOC440926
					LOC440927
					LOC440957
					LOC440991
					LOC441013
					LOC441050
					LOC441073
					LOC441089
					LOC441377
					LOC441506
					LOC441775
					LOC442454
					LOC442727
					LOC493869
					LOC552889
					LOC641768
					LOC641814
					LOC641844
					LOC641978
					LOC642033
					LOC642502
					LOC642590
					LOC642817
					LOC642897
					LOC642975
					LOC642989
					LOC643031
					LOC643284
					LOC643287
					LOC643310
					LOC643336
					LOC643357
					LOC643358
					LOC643384
					LOC643438
					LOC643507
					LOC643668
					LOC643790
					LOC643949
					LOC643997
					LOC644033
					LOC644063
					LOC644131
					LOC644132
					LOC644162
					LOC644214
					LOC644237
					LOC644250
					LOC644330
					LOC644422
					LOC644584
					LOC644604
					LOC644615
					LOC644739
					LOC644745
					LOC644762
					LOC644774
					LOC644799
					LOC644863
					LOC644877
					LOC644879
					LOC644914
					LOC644937
					LOC644988
					LOC645018
					LOC645138
					LOC645173
					LOC645251
					LOC645317
					LOC645332
					LOC645381
					LOC645385
					LOC645387
					LOC645436
					LOC645638
					LOC645968
					LOC645979
					LOC646044
					LOC646197
					LOC646294
					LOC646347
					LOC646407
					LOC646463
					LOC646483
					LOC646531
					LOC646688
					LOC646723
					LOC646791
					LOC646819
					LOC646849
					LOC646966
					LOC647000
					LOC647030
					LOC647037
					LOC647081
					LOC647276
					LOC647285
					LOC647302
					LOC647340
					LOC647349
					LOC647886
					LOC648024
					LOC648099
					LOC648210
					LOC648390
					LOC649049
					LOC649553
					LOC649555
					LOC649821
					LOC650152
					LOC650369
					LOC650832
					LOC651202
					LOC651436
					LOC651453
					LOC651575
					LOC651697
					LOC651816
					LOC652388
					LOC652481
					LOC652545
					LOC652595
					LOC652669
					LOC652685
					LOC652815
					LOC652864
					LOC653119
					LOC653226
					LOC653377
					LOC653383
					LOC653505
					LOC653566
					LOC653583
					LOC653658
					LOC653773
					LOC653874
					LOC653994
					LOC654103
					LOC723972
					LOC727826
					LOC727865
					LOC727967
					LOC727980
					LOC728006
					LOC728059
					LOC728069
					LOC728126
					LOC728138
					LOC728188
					LOC728229
					LOC728324
					LOC728368
					LOC728428
					LOC728457
					LOC728505
					LOC728532
					LOC728556
					LOC728564
					LOC728590
					LOC728620
					LOC728643
					LOC728661
					LOC728672
					LOC728791
					LOC728820
					LOC728873
					LOC728877
					LOC728888
					LOC728969
					LOC728973
					LOC729009
					LOC729102
					LOC729148
					LOC729200
					LOC729279
					LOC729375
					LOC729406
					LOC729423
					LOC729466
					LOC729495
					LOC729505
					LOC729535
					LOC729580
					LOC729617
					LOC729646
					LOC729679
					LOC729708
					LOC729768
					LOC729769
					LOC729774
					LOC729816
					LOC729841
					LOC729843
					LOC729859
					LOC729964
					LOC730074
					LOC730246
					LOC730313
					LOC730316
					LOC730534
					LOC730740
					LOC730744
					LOC730820
					LOC730994
					LOC731049
					LOC731777
					LOC731985
					LOC732007
					LOC732165
					LOC91561
					LOC92659
					LOC92755
					LOC93622
					LONP1
					LPP
					LPPR2
					LPXN
					LQK1
					LRAP
					LRFN4
					LRP10
					LRP11
					LRP3
					LRP8
					LRPAP1
					LRRC28
					LRRC41
					LRRC42
					LRRC8A
					LRWD1
					LSM14A
					LSM3
					LSM4
					LSMD1
					LTA4H
					LTBR
					LTV1
					LUZP1
					LY6E
					LY96
					LYN
					LYPD6B
					LYRM1
					LYRM2
					LYSMD2
					LZTR1
					M160
					M6PR
					MACROD1
					MAD1L1
					MAD2L1
					MAD2L2
					MAEA
					MAF1
					MAFG
					MAGEF1
					Magmas
					MAN2B2
					MAP1LC3B
					MAP2K1
					MAP3K1
					MAP3K6
					MAP4K2
					MAP7D1
					MAPK11
					MAPK3
					MAPK9
					MAPKAP1
					MAPKAPK5
					MAPRE1
					MAPRE2
					MARCH2
					MARCH6
					MARCH7
					MARCKS
					MARCKSL1
					MAT2A
					MAT2B
					MBD3
					MBTPS1
					MCCC1
					MCL1
					MCM2
					MCM3
					MCM3AP
					MCM4
					MCM6
					MCM7
					MCOLN1
					MCRS1
					MDC1
					MDH1
					MDP1
					MED10
					MED16
					MED20
					MED25
					MED27
					MED28
					MED29
					MED4
					MED6
					MED8
					MEF2D
					MELK
					MEMO1
					MESP1
					METAP1
					METAP2
					METRN
					METTL11A
					METTL13
					METTL3
					MFN2
					MFSD1
					MFSD10
					MFSD11
					MFSD3
					MGAT1
					MGC39900
					MGC70857
					MGC71993
					MGC87895
					MGEA5
					MGMT
					MGST1
					MIB2
					MICB
					MID1IP1
					MIDN
					MIF4GD
					MIPEP
					MIR1228
					MIR1974
					MIR1978
					MIS12
					MITD1
					MKI67IP
					MKRN1
					MKRN2
					MLEC
					MLF2
					MLH1
					MLLT11
					MLST8
					MMACHC
					MMADHC
					MMD
					MMGT1
					MNT
					MOBKL3
					MORF4L2
					MORG1
					MPDU1
					MPST
					MPV17L2
					MPZL1
					MR1
					MRFAP1
					MRLC2
					MRPL10
					MRPL12
					MRPL13
					MRPL16
					MRPL18
					MRPL19
					MRPL22
					MRPL23
					MRPL32
					MRPL35
					MRPL38
					MRPL4
					MRPL45
[truncated: 1,481 more rows]
