# Supplementary material for: LGALS3 Promotes Treatment Resistance in Glioblastoma and Is Associated with Tumor Risk and Prognosis
Source: Oxford University Press journal article supplement (doi:10.1158/1055-9965.epi-18-0638), 2018-10-19
Supplement: 10559965epi180638-sup-203083_3_supp_5024869_pvxvgm.docx [file 10559965epi180638-sup-203083_3_supp_5024869_pvxvgm.docx]

**Supplementary Table 2.** Multivariate analysis of factors associated with overall survival of glioblastoma patients in TCGA database (HG-U133A)

| **Factors** | **HR** | **95% CI** | **p** |
| --- | --- | --- | --- |
| Age (≥60 vs. <60) | 1.581 | 1.168-2.139 | 0.003 |
| Primary vs. Secondary | 0.525 | 0.306-0.902 | 0.020 |
| MGMT methylation (+ vs. -) |  |  | 0.191 |
| IDH1 (Mutant vs. Wildtype) | 0.485 | 0.272-0.866 | 0.014 |
| Chemotherapy (Yes vs. No) | 0.408 | 0.296-0.563 | 0.001 |
| Radiotherapy (Yes vs. No) | 0.225 | 0.108-0.468 | 0.001 |
| LGALS3 (High vs. Low) | 1.324 | 0.996-1.761 | 0.054 |
